# Supplementary material for: MPXV replication and drug resistance in CNS of advanced HIV case at autopsy
Source: Research Square preprint supplement (doi:10.21203/rs.3.rs-9282876/v1), 2026-04-09
Supplement: Supplementary file 1 [file cb3e433277320d99b4641e78.docx]

Supplementary Methods

**Mpox ddPCR DNA Quantification**

Mpox DNA was quantified using the QX600 AutoDG Droplet Digital (dd)PCR System (Bio-Rad) to detect and quantify mpox genes VP39 (forward primer 5’-AGTAAGTTACAGCGACACGG-3’; reverse primer 5’-GTGTACCTGGAGCAGATCCT-3’; probe 5’-Cy5.5-AGATGGCGCCACCGTAGTGT-3’), A22R (forward primer 5’-ATGGTAGAACTTGGATCTGGA -3’; reverse primer 5’-GAAAGTCTATTCCGTTATCACTATCT-3’; probe 5’-HEX-ACCGGATGAGATTCGAAGTGCGT-3’)and A13L (forward primer 5’- CGACCATTCCACGAACTTCT-3’; reverse primer 5’-ACGCAATGGATGGTCAGATT-3’; probe 5’-Cy5 -AATTGGCCGTCTCTAACGGTACCA-3’) in technical duplicates of 5uL tissue eluent, diluted if necessary. Raw data were collected using QX Manager Standard Edition Version 2.1.0.25. Results were normalized to average copies of targets VP39, A22R, and A13L per milligram of tissue. Samples were required to pass the manufacturer’s limit of detection (LOD) for the RP gene of ≥0.2 copies per microliter and ≥4 positive droplets per well to ensure DNA extraction was successful. For tissue eluents to be considered positive for mpox genes VP39, A22R, and A13L, technical duplicates were required to surpass the manufacturer’s LOD of ≥0.1 copies per microliter and ≥2 droplets per well for each target.

**Mpox Genome Sequencing**

The quality of genomic DNA (gDNA) containing MPXV was assessed on the Agilent TapeStation 4200 (Agilent Technologies, Inc., CA) using Genomic tapes/reagents. Two hundred nanograms of gDNA was sheared to an average size of 350 bp using the Covaris LE220 (Covaris, LLC, MA) and final libraries were prepared using the Illumina TruSeq DNA Nano v2 protocol (Illumina, CA) with Illumina TruSeq UD Indexes as barcoded primers. Final libraries were visualized on a TapeStation 4200 (Agilent Technologies, Inc., CA), and quantified using the Qubit fluorometer 3 (ThermoFisher, MA) and dsDNA high sensitivity quantification kit. The libraries were aliquoted into 6 pools, consisting of 74-485 ng of each library. Viral sequences were captured using the Kapa HyperCap enrichment kit (Roche Diagnostics, IN) with the Kapa HyperExplore VES_viral probe set.1,2 Following hybridization and washing the captures were amplified with 18 cycles of PCR. The 6 capture pools were analyzed using the Agilent bioanalyzer and quantified using the Qubit Fluorometer 3. The 6 captures were diluted to a final concentration of 2 nM and pooled. The pool was further diluted in NextSeq 1000/2000 RSB with Tween 20 buffer (Illumina, CA) to 750 pM and paired-end 2 x 150 cycle sequencing carried out on the NextSeq 2000 instrument using a P1 XLEAP-SBS flow cell and 300 cycle reagent kit.

**Sequencing Data analysis**

Raw FASTQ reads were trimmed of adapter sequences using Cutadapt version 4.4 and filtered for quality using FASTX-Toolkit version 0.0.14.3,4 Reads were then screened against the human genome to remove host reads. Remaining reads were aligned to mpox virus isolate Monkeypox virus isolate MPXV_USA_2022_MA001 using Bowtie2 version 2.5.1.5 Variants were identified using GATK HaplotypeCaller version 4.4.0.0.6 One sample containing a low number of variants, obtained from the Basilar Artery, was used as a baseline reference for further analysis. For this sample, 2 regions containing repetitive sequence were masked with Ns and a new consensus sequence was generated using GATK FastaAlternateReferenceMaker version 4.4.0.0.6 Filtered and trimmed reads for all samples were then aligned to the new masked reference using Bowtie2, variants were called using GATK HaplotypeCaller and consensus sequences were generated for all samples using GATK FastaAlternateReferenceMaker. Alignments were built with MAFFT (FFT-NS-1 algorithm), with the best model for distance estimates identified with the ModelFinder function as the one with the lowest Bayesian information criterion (BIC).7,8 Maximum likelihood phylogenetic tree was constructed using IQ-TREE2 and branch support was assessed using SH-like approximate likelihood ratio test (SH-aLRT). ABOBEC3 analysis was performed following the method of O’Toole et al 2023.9 Phylogenetic trees were visualized in FigTree [(http://tree.bio.ed.ac.uk/software/figtree).](http://tree.bio.ed.ac.uk/software/figtree).205)10

**Mpox Isolation**

Flash frozen tissue sections weighing 70-800 grams were homogenized in 1mL DMEM supplemented with 2% FBS, 1 mM l-glutamine, 50 U ml−1 penicillin and 50 μg ml−1 streptomycin (DMEM2) for 10 minutes and centrifuged for 5 minutes at 8000 rpm. 300uL of supernatants at 1:10, 1:100, and 1:1000 dilutions were added to Vero E6 cells cultured in DMEM2. Plates were centrifuged for 30 minutes at 1000 x g, incubated for 30 minutes at 37 °C, inoculum was removed, and wells were washed twice with 300uL DMEM2 before adding 500uL DMEM2. Plates were incubated at 37°C for five days and scored for cytopathic effect (CPE). Supernatant and cell monolayers were collected and passaged a second time to confirm true negatives. Following each passage, cell monolayers and supernatants were collected and subjected to a freeze-thaw to facilitate nucleic acid extraction. Samples were centrifuged for 5 minutes at 8000 rpm, 140ul of supernatant was added to 560uL buffer AVL (Qiagen, Cat No. 19073), incubated for 10 minutes at room temperature, transferred to clean cryovials containing 560uL of 100% ethanol, and incubated for 10 minutes at room temperature to complete viral inactivation. Nucleic acid extraction was processed using the QIAamp Viral RNA Kit (Qiagen, Cat No. 52904) following the manufacturer’s protocol. Extracted nucleic acids were subjected to quantitative real-time polymerase chain reaction (qRT-PCR) according to methods previously described for detection of mpox DNA to rule out other causes of cytopathic effect.11 Viral plaques were confirmed to contain replication-competent viruses by a reduction in qRT-PCR cycle threshold (Ct) values from first passage to second passage cell culture supernatants.

Supplementary Results

**Table S1: MPXV-infected cell types in tissues detected by ISH**

| **Cell type** | **Tissue** |
| --- | --- |
| Squamous epithelium | Skin, Uvula |
| Mucosal epithelium | Aero-digestive tract |
| Mucus glands | Sinus |
| Myocyte | Muscle |
| Vascular Smooth Muscle | Multiple |
| Endothelium | Multiple |
| Adipocyte | Multiple |
| Lymphocytes (T-cells) | Thymus, liver |
| Fibroblast | Pericardium |
| Neuron, astrocyte | Brain |
| Pneumocyte | Lung |
| Dura stromal cell | Dura |
| Sertoli cells | Testis |

**Table S2: Mpox isolation from postmortem tissues**

| Tissue | RNAlater-preserved tissue | CPE (+/-) | Flash frozen cell culture supernatant | | |
| --- | --- | --- | --- | --- | --- |
| Mean vDNA target copies/mg tissue | Passage #1 Ct | Passage #2 Ct | ΔCt |
| Desquamated Skin (10) | 6.71E+07 | + | 16.969 | 14.873 | -2.096 |
| Crusted Skin (6) | 5.68E+07 | + | 15.143 | 13.029 | -2.114 |
| Uvula | 5.61E+06 | + | 16.891 | 26.833 | 9.942 |
| Scarred Skin (2) | 5.98E+05 | + | 18.599 | 11.982 | -6.617 |
| Salivary Gland | 3.20E+05 | - | 27.658 | N/A |  |
| Optic Nerve | 1.32E+05 | - | 23.630 | N/A |  |
| Colon | 1.16E+05 | - | 32.194 | N/A |  |
| Bronchus | 9.22E+04 | - | 33.769 | 37.909 | 4.140 |
| Intact Skin (12) | 7.28E+04 | + | 22.674 | 17.550 | -5.124 |
| Thymus | 6.73E+04 | - | 34.607 | N/A |  |
| Sciatic Nerve | 4.82E+04 | - | 31.170 | N/A |  |
| Dura Mater | 3.94E+04 | + | 22.964 | 20.026 | -2.938 |
| Nasal placode | 3.46E+04 | - | 35.973 | N/A |  |
| Sinus Turbinate | 2.89E+04 | + | 22.097 | 12.691 | -9.405 |
| Lymph Node | 2.79E+04 | - | 34.167 | N/A |  |
| Olfactory Nerve | 1.35E+04 | + | 19.052 | 13.920 | -5.133 |
| R Testis | 1.30E+04 | - | 30.915 | N/A |  |
| Basilar artery | 1.21E+04 | - | 29.439 | N/A |  |
| Vena Cava | 1.07E+04 | - | 33.675 | N/A |  |
| Skeletal Muscle | 9.71E+03 | + | 23.325 | 23.052 | -0.273 |
| Pericardium | 9.32E+03 | - | 33.111 | 39.043 | 5.932 |
| Bone Marrow | 8.14E+03 | + | 27.959 | 35.771 | 7.812 |
| Frontal Lobe | 8.06E+03 | + | 25.289 | 12.563 | -12.72 |
| Adrenal Gland | 7.40E+03 | - | 33.985 | N/A |  |
| Medulla | 4.74E+03 | + | 20.776 | 20.532 | -0.245 |
| L Testis | 3.48E+03 | - | 29.457 | N/A |  |
| Pancreas | 3.27E+03 | - | 35.732 | N/A |  |
| Thalamus | 1.93E+03 | + | 22.210 | 22.366 | 0.156 |
| IV Septum | 9.96E+02 | - | 35.653 | N/A |  |
| Spleen | 9.89E+02 | - | 30.669 | N/A |  |
| Kidney | 5.47E+02 | - | 36.273 | N/A |  |
| Liver | 1.19E+02 | + | 33.511 | 16.871 | -16.64 |
| Midbrain | 1.06E+02 | + | 35.377 | 20.032 | -15.34 |

CPE, cytopathic effect; Ct, cycle threshold.

References

1. Yinda CK, Koukouikila-Koussounda F, Mayengue PI, Elenga RG, Greene B, Ochwoto M, Indolo GD, Mavoungou YVT, Boussam DAE, Ampiri BRV, Mfoutou CCM, Mbouala YDK, Ntoumi F, Kankou JM, Munster VJ, Niama FR. Genetic sequencing analysis of monkeypox virus clade I in Republic of the Congo: a cross-sectional, descriptive study. Lancet. 2024 Nov 9;404(10465):1815-1822. doi: 10.1016/S0140-6736(24)02188-3. Epub 2024 Oct 16. PMID: 39426387.
2. Hawes, K.; Greene, B.; Weishampel, Z.A.; Beare, P.A.; van Tol, S.; Schaughency, P.; Kuhn, S.; Peel, A.J.; Munster, V.J.; Yinda, C.K. Evaluation of a Probe-Based Enrichment Protocol for Nanopore Sequencing of Zoonotic Viruses. Viruses 2025, 17, 1465. https://doi.org/10.3390/v17111465
3. Martin M. Cutadapt removes adapter sequences from highthroughput sequencing reads. EMBnet J 2011; 17: 3.
4. Gordon A. FASTX-Toolkit (RRID:SCR_005534). https://github. com/agordon/fastx_toolkit (accessed May 5, 2024).
5. Langmead B, Salzberg SL. Fast gapped-read alignment with Bowtie 2. Nat Methods 2012; 9: 357–59.
6. Van der Auwera GA & O'Connor BD. (2020). Genomics in the Cloud: Using Docker, GATK, and WDL in Terra (1st Edition). O'Reilly Media.
7. Katoh K, Standley DM. MAFFT Multiple Sequence Alignment Software Version 7: Improvements in Performance and Usability. Mol Biol Evol. 2013 Apr 1;30(4):772–80.
8. Kalyaanamoorthy S, Minh BQ, Wong TKF, von Haeseler A, Jermiin LS. ModelFinder: fast model selection for accurate phylogenetic estimates. Nat Methods. 2017 June;14(6):587–9.
9. O’Toole Á, Neher RA, Ndodo N, Borges V, Gannon B, Gomes JP, et al. APOBEC3 deaminase editing in mpox virus as evidence for sustained human transmission since at least 2016. Science. 2023 Nov 3;382(6670):595–600.
10. Minh BQ, Schmidt HA, Chernomor O, Schrempf D, Woodhams MD, von Haeseler A, et al. IQ-TREE 2: New Models and Efficient Methods for Phylogenetic Inference in the Genomic Era. Molecular Biology and Evolution. 2020 May 1;37(5):1530–4.
11. Port JR, Riopelle JC, Smith SG, Myers L, Kaiser FK, Lewis MC, et al. Infection with mpox virus via the genital mucosae increases shedding and transmission in the multimammate rat (Mastomys natalensis). Nat Microbiol. 2024 May;9(5):1231–43.
